# Supplementary material for: Neutralizing Antibody Response to BBIBP-CorV in Comparison with COVID-19 Recovered, Unvaccinated Individuals in a Sample of the Pakistani Population
Source: MDPI journal article supplement (doi:10.3390/vaccines10050692), 2022-04-28
Supplement: s1 [file s1]

## Supplementary Figures and Tables

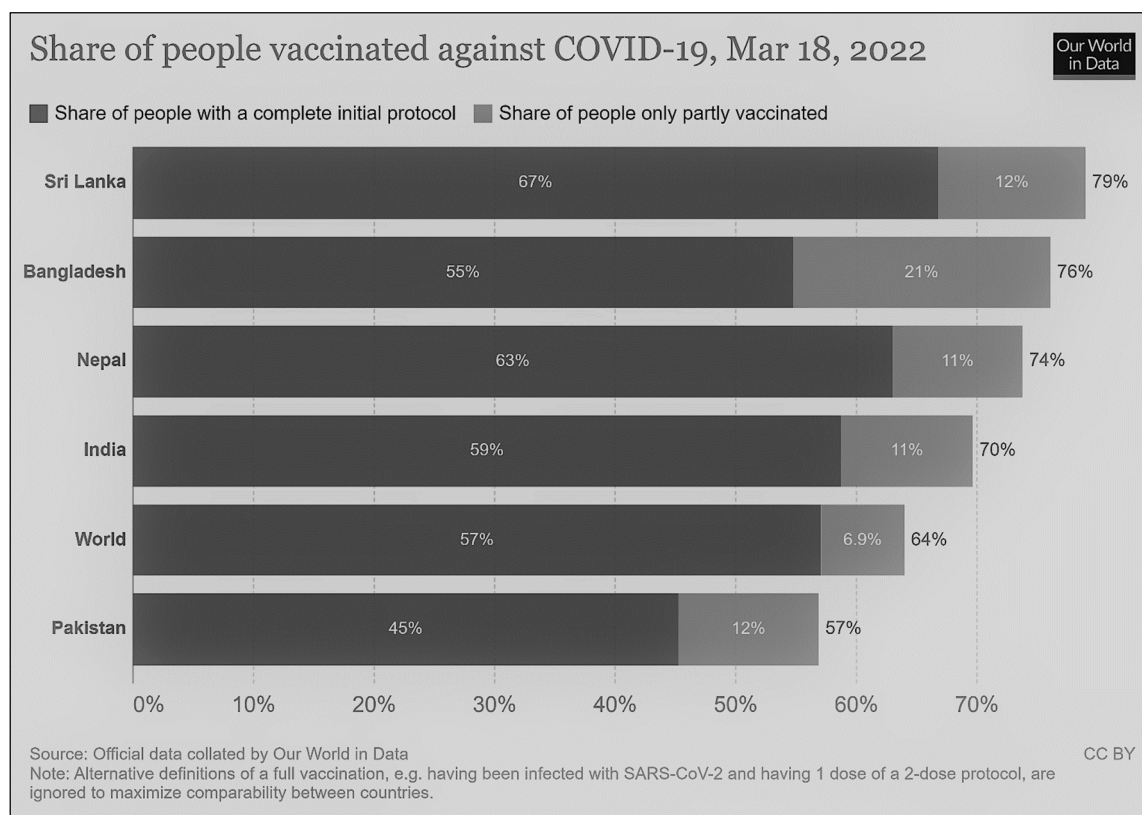

**Figure S1.** Percentage of people vaccinated against COVID-19 in South Asia in comparison with the world average (Hannah Ritchie, Edouard Mathieu, Lucas Rod s-Guirao, Cameron Appel, Charlie Giattino, Esteban Ortiz-Ospina, Joe Hasell, Bobbie Macdonald, Diana Beltekian and Max Roser (2020) - "Coronavirus Pandemic (COVID-19)". Published online at OurWorldInData.org. Retrieved from: 'https://ourworldindata.org/coronavirus'. (Accessed on 18 March 2022).

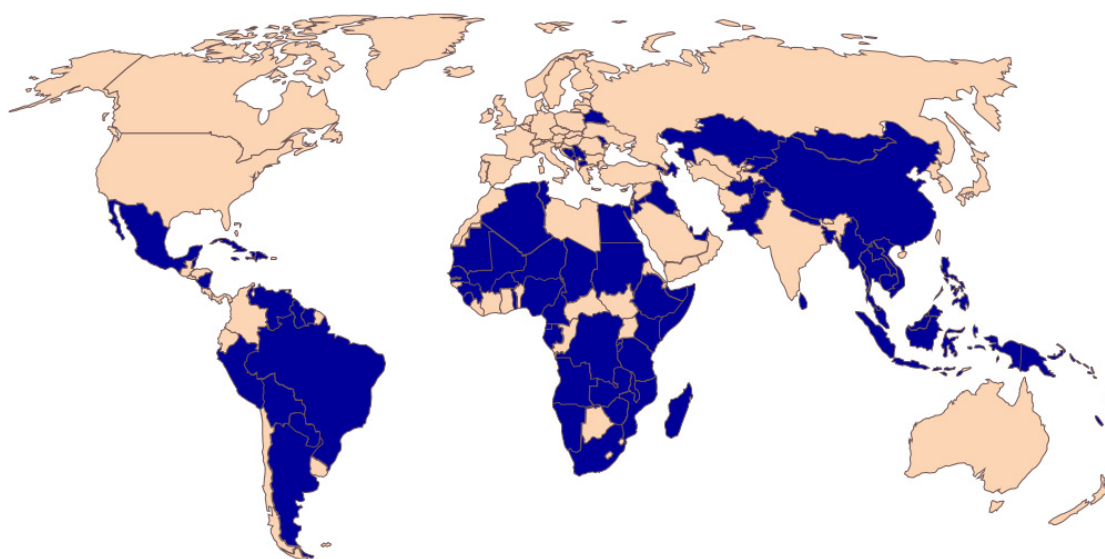

**Figure S2.** World map with countries where BBIB-CorV is approved for use (blue). Source: www.freeworldmaps.net (Accessed on 15 March 2022).

**Table S1.** Raw data per specimen segregated according to the three study groups, and including the interval in days between the second dose of vaccine and specimen collection for Group I and Group III, and between symptom onset and specimen collection for Group III (second column from the left); results of the Abbott SARS-CoV-2 Quant II immunoassay in AU / ml converted into their respective log10 values (third column from the left); and log 10 IC50 of the pseudotyped lentivirus antibody neutralization assays (last column from the left).

| Specimen # | Days post 2 <sup>nd</sup> vaccine dose/symptom onset | Log AU / ml (immunoassay) | Log IC50 (neutralizing assay) |
|------------|------------------------------------------------------|---------------------------|-------------------------------|
| Group I    |                                                      |                           |                               |
| 1          | 31                                                   | 3.4                       | 2.1                           |
| 2          | 38                                                   | 3.1                       | 2.2                           |
| 3          | 37                                                   | 3.9                       | 3.8                           |
| 4          | 39                                                   | 2.4                       | 2.0                           |
| 5          | 32                                                   | 3.7                       | 3.7                           |
| 6          | 33                                                   | 2.6                       | 2.5                           |
| 7          | 54                                                   | 3.1                       | 2.9                           |
| 8          | 33                                                   | 2.4                       | 2.0                           |
| 9          | 31                                                   | 2.6                       | 1.1                           |
| 10         | 31                                                   | 2.5                       | 2.3                           |
| 11         | 33                                                   | 3.1                       | 2.4                           |
| 12         | 56                                                   | 3.1                       | 2.9                           |
| 13         | 32                                                   | 1.3                       | 0.3                           |
| 14         | 33                                                   | 3.1                       | 1.3                           |
| 15         | 48                                                   | 2.9                       | 1.5                           |
| 16         | 32                                                   | 2.0                       | 1.3                           |
| 17         | 32                                                   | 2.8                       | 3.1                           |
| 18         | 31                                                   | 2.3                       | 2.9                           |
| 19         | 31                                                   | 2.6                       | 4.3                           |
| 20         | 36                                                   | 2.3                       | 2.5                           |
| 21         | 32                                                   | 2.5                       | 1.0                           |
| 22         | 32                                                   | 2.7                       | 2.4                           |
| 23         | 37                                                   | 2.6                       | 2.6                           |
| 24         | 36                                                   | 2.7                       | 1.4                           |
| 25         | 38                                                   | 2.6                       | 1.3                           |
| 26         | 33                                                   | 2.4                       | 1.6                           |
| 27         | 33                                                   | 2.1                       | 1.5                           |
| 28         | 51                                                   | 3.1                       | 3.1                           |
| 29         | 33                                                   | 3.0                       | 1.3                           |
| 30         | 33                                                   | 2.9                       | 1.9                           |
| 31         | 52                                                   | 2.8                       | 2.1                           |
| 32         | 37                                                   | 3.0                       | 2.6                           |
| 33         | 33                                                   | 1.8                       | 1.4                           |
| 34         | 34                                                   | 2.7                       | 2.2                           |
| 35         | 34                                                   | 2.4                       | 1.3                           |
| 36         | 31                                                   | 2.4                       | 3.9                           |
| 37         | 31                                                   | 3.4                       | 2.1                           |
| 38         | 52                                                   | 2.5                       | 1.1                           |
| 39         | 32                                                   | 2.8                       | 2.2                           |
| 40         | 33                                                   | 3.0                       | 2.1                           |
| 41         | 30                                                   | 2.2                       | 1.5                           |
| 42         | 39                                                   | 3.0                       | 2.1                           |

|    |    |     |      |
|----|----|-----|------|
| 43 | 31 | 1.8 | 2.2  |
| 44 | 32 | 3.1 | 2.9  |
| 45 | 33 | 2.3 | 1.3  |
| 46 | 47 | 3.6 | 3.8  |
| 47 | 35 | 2.3 | 2.7  |
| 48 | 35 | 3.5 | 2.2  |
| 49 | 39 | 2.8 | 1.2  |
| 50 | 31 | 3.2 | 2.8  |
| 51 | 53 | 2.4 | 4.7  |
| 52 | 35 | 3.4 | 4.0  |
| 53 | 40 | 2.9 | -0.9 |
| 54 | 35 | 2.1 | 1.6  |
| 55 | 31 | 2.5 | 1.8  |
| 56 | 37 | 3.5 | 2.9  |
| 57 | 32 | 2.4 | 2.1  |
| 58 | 48 | 1.7 | 3.1  |
| 59 | 41 | 2.7 | 1.9  |
| 60 | 39 | 2.9 | 2.1  |

### Group II

|    |    |     |     |
|----|----|-----|-----|
| 1  | 29 | 3.7 | 4.8 |
| 2  | 33 | 3.4 | 2.3 |
| 3  | 31 | 3.5 | 3.9 |
| 4  | 32 | 3.3 | 2.4 |
| 5  | 31 | 2.5 | 2.5 |
| 6  | 30 | 3.3 | 4.2 |
| 7  | 32 | 2.8 | 2.4 |
| 8  | 30 | 3.8 | 2.7 |
| 9  | 31 | 3.1 | 3.2 |
| 10 | 54 | 3.6 | 3.1 |
| 11 | 57 | 3.4 | 3.0 |
| 12 | 44 | 3.2 | 2.7 |
| 13 | 35 | 3.4 | 2.1 |
| 14 | 43 | 3.6 | 3.8 |
| 15 | 53 | 2.9 | 3.7 |
| 16 | 35 | 2.7 | 2.7 |
| 17 | 55 | 3.3 | 2.4 |
| 18 | 34 | 3.9 | 2.8 |
| 19 | 29 | 4.4 | 2.4 |
| 20 | 32 | 2.5 | 1.7 |
| 21 | 47 | 3.5 | 3.9 |
| 22 | 33 | 3.1 | 3.1 |
| 23 | 54 | 2.5 | 2.7 |
| 24 | 45 | 2.8 | 2.2 |
| 25 | 34 | 3.5 | 3.3 |
| 26 | 40 | 2.8 | 2.9 |
| 27 | 50 | 2.7 | 2.9 |
| 28 | 33 | 2.6 | 2.4 |
| 29 | 33 | 2.6 | 2.7 |

|    |    |     |     |
|----|----|-----|-----|
| 30 | 29 | 2.4 | 2.3 |
| 31 | 34 | 3.6 | 2.6 |
| 32 | 35 | 3.0 | 2.9 |
| 33 | 33 | 3.2 | 2.7 |
| 34 | 31 | 3.1 | 2.1 |
| 35 | 31 | 3.3 | 3.6 |
| 36 | 29 | 2.7 | 3.2 |
| 37 | 40 | 3.6 | 3.2 |
| 38 | 33 | 2.6 | 2.3 |
| 39 | 31 | 3.6 | 2.6 |
| 40 | 30 | 2.0 | 2.2 |
| 41 | 38 | 3.2 | 3.9 |
| 42 | 31 | 3.2 | 2.6 |
| 43 | 38 | 2.4 | 1.4 |
| 44 | 56 | 3.0 | 3.0 |
| 45 | 28 | 2.9 | 2.9 |
| 46 | 53 | 2.7 | 3.1 |
| 47 | 51 | 3.0 | 3.1 |
| 48 | 37 | 2.7 | 4.2 |
| 49 | 50 | 3.3 | 3.7 |
| 50 | 48 | 3.8 | 2.8 |
| 51 | 38 | 1.6 | 1.2 |
| 52 | 54 | 3.1 | 2.1 |
| 53 | 39 | 2.7 | 2.6 |
| 54 | 41 | 2.6 | 2.3 |
| 55 | 37 | 2.7 | 1.6 |
| 56 | 34 | 3.7 | 2.8 |
| 57 | 33 | 3.0 | 3.7 |
| 58 | 40 | 2.0 | 2.8 |
| 59 | 32 | 2.5 | 2.1 |
| 60 | 37 | 3.3 | 2.5 |

| Group III |    |     |     |
|-----------|----|-----|-----|
| 1         | 28 | 3.2 | 2.0 |
| 2         | 36 | 3.0 | 3.1 |
| 3         | 47 | 2.6 | 1.8 |
| 4         | 36 | 1.7 | 1.9 |
| 5         | 48 | 2.8 | 2.3 |
| 6         | 43 | 2.2 | 1.4 |
| 7         | 33 | 3.3 | 3.2 |
| 8         | 49 | 4.0 | 3.5 |
| 9         | 53 | 3.7 | 2.4 |
| 10        | 28 | 3.2 | 3.2 |
| 11        | 33 | 2.8 | 4.0 |
| 12        | 41 | 1.9 | 2.9 |
| 13        | 52 | 2.9 | 3.6 |
| 14        | 28 | 3.1 | 3.5 |
| 15        | 33 | 2.5 | 2.2 |
| 16        | 29 | 1.7 | 2.5 |

|    |    |     |     |
|----|----|-----|-----|
| 17 | 44 | 3.6 | 4.6 |
| 18 | 41 | 3.6 | 4.0 |
| 19 | 41 | 4.2 | 3.4 |
| 20 | 30 | 3.1 | 2.4 |
| 21 | 42 | 3.2 | 0.7 |
| 22 | 49 | 4.5 | 3.8 |
| 23 | 28 | 3.7 | 2.9 |
| 24 | 43 | 3.7 | 4.6 |
| 25 | 35 | 4.4 | 2.9 |
| 26 | 42 | 3.8 | 3.6 |
| 27 | 31 | 3.4 | 2.6 |
| 28 | 28 | 2.2 | 2.9 |
| 29 | 36 | 3.8 | 2.7 |
| 30 | 44 | 4.3 | 3.8 |
| 31 | 35 | 3.3 | 1.9 |
| 32 | 42 | 3.5 | 1.5 |
| 33 | 41 | 4.4 | 3.9 |
| 34 | 30 | 0.7 | 2.1 |
| 35 | 33 | 3.4 | 2.6 |
| 36 | 38 | 3.9 | 3.9 |
| 37 | 38 | 2.7 | 2.2 |
| 38 | 37 | 3.4 | 2.3 |
| 39 | 35 | 3.5 | 2.1 |
| 40 | 36 | 2.5 | 1.4 |
| 41 | 39 | 2.4 | 4.6 |
| 42 | 34 | 3.9 | 3.6 |
| 43 | 51 | 3.8 | 4.5 |
| 44 | 31 | 2.3 | 2.7 |
| 45 | 32 | 1.8 | 2.3 |
| 46 | 53 | 3.7 | 3.4 |
| 47 | 31 | 3.7 | 3.5 |
| 48 | 52 | 0.8 | 1.0 |
| 49 | 37 | 2.1 | 2.6 |
| 50 | 42 | 3.7 | 3.5 |
| 51 | 31 | 3.1 | 5.0 |
| 52 | 30 | 1.2 | 3.1 |
| 53 | 30 | 2.0 | 3.0 |
| 54 | 31 | 2.5 | 3.4 |
| 55 | 37 | 3.2 | 3.8 |
| 56 | 50 | 2.0 | 3.3 |
| 57 | 48 | 3.8 | 3.1 |
| 58 | 38 | 3.7 | 3.5 |
| 59 | 35 | 1.8 | 1.6 |
| 60 | 28 | 2.7 | 2.8 |

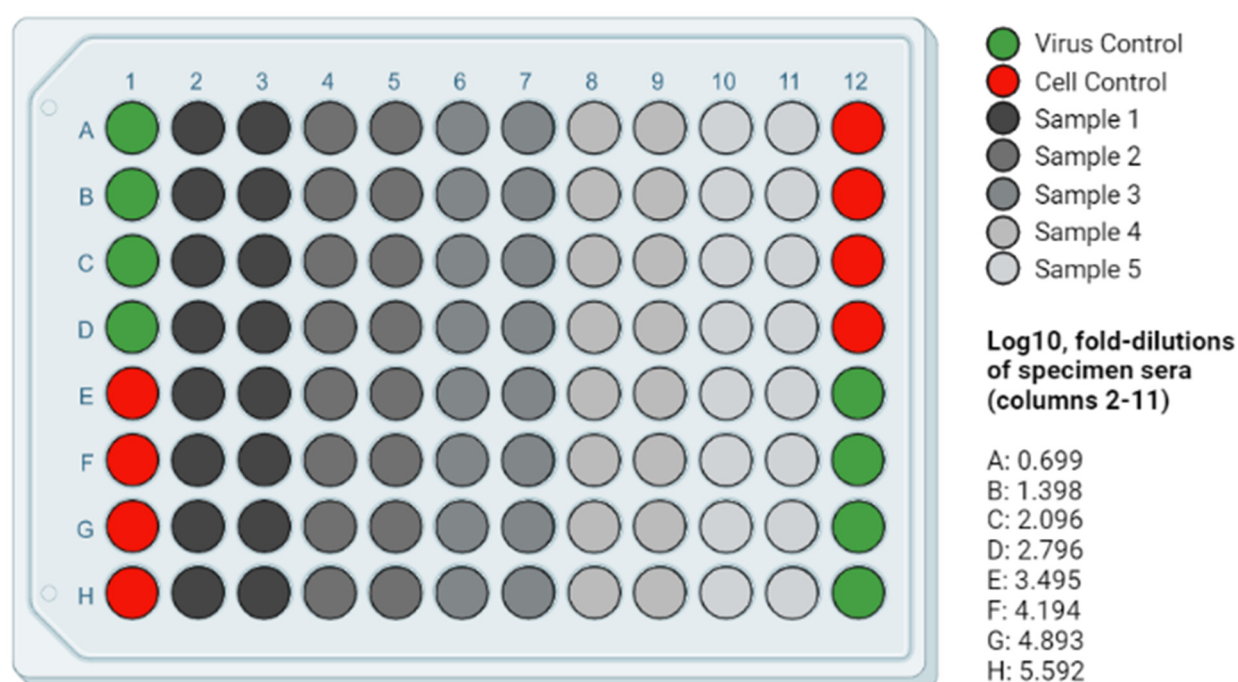

**Figure S3.** Plate map of black-walled, clear-bottom 96-well plates used for the final readout of the pseudotyped lentivirus antibody neutralization assay. Specimens, run in duplicates and shown in greyscale, were serially diluted vertically, starting from row A and ending at row H. The figure legend indicates the final row-wise fold-dilutions of sera used for each specimen, expressed as their corresponding log10 values (image created in BioRender.com).

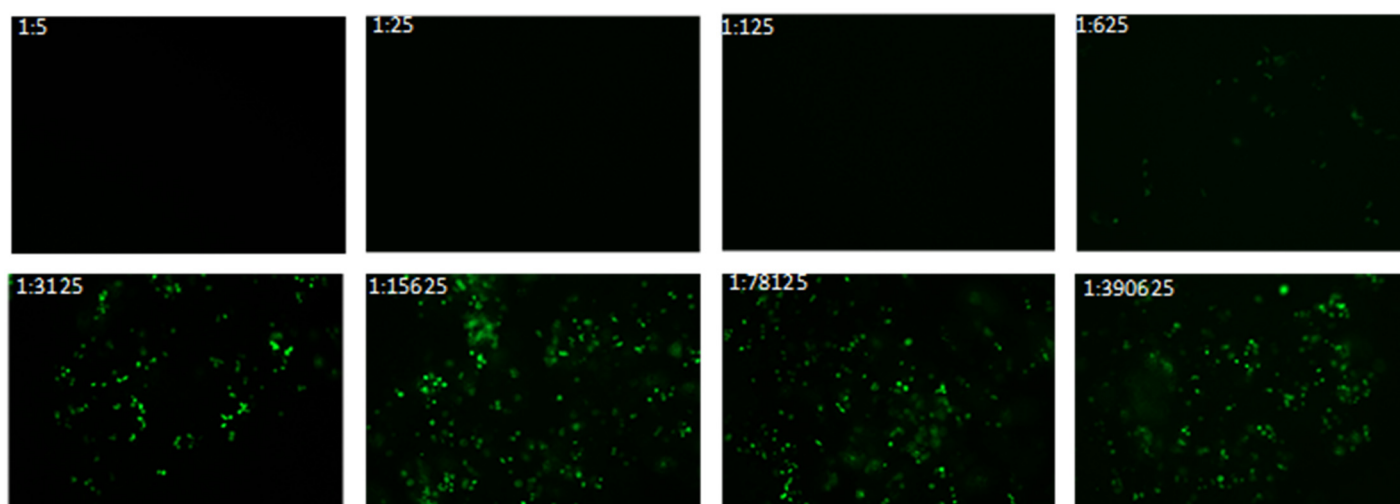

**Figure S4.** Fluorescent microscopic images of pseudotyped lentivirus antibody neutralization assay. The top left corner of each image shows the serum sample dilution used in the corresponding well.

**Table S2.** Serum sample dilution versus ZsGreen positivity on flow cytometry.

| Serum dilution | ZsGreen % positivity |
|----------------|----------------------|
| 1:5            | 2.1                  |
| 1:25           | 5.1                  |
| 1:125          | 6.3                  |
| 1:625          | 14.3                 |
| 1:3125         | 16.5                 |
| 1:15625        | 20.5                 |
| 1:71825        | 27.2                 |

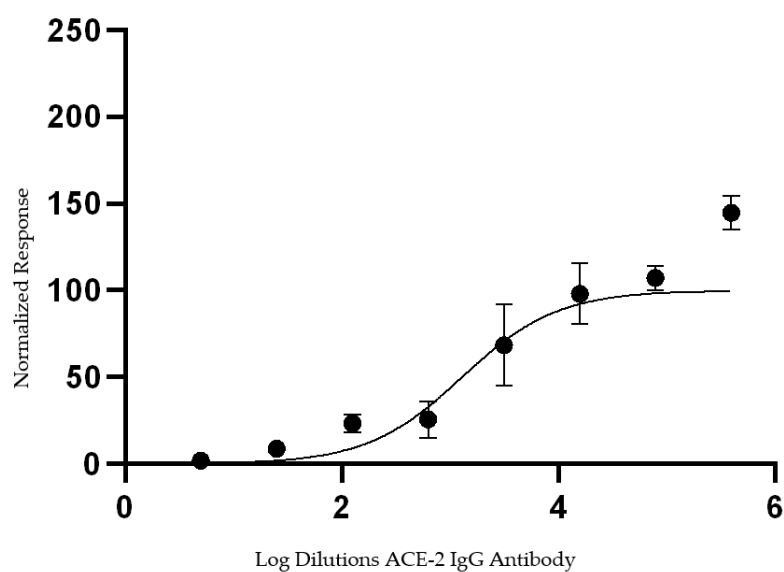**Figure S5.** Log dilutions of ACE-2 IgG Antibody versus RLU expressed as normalized response.

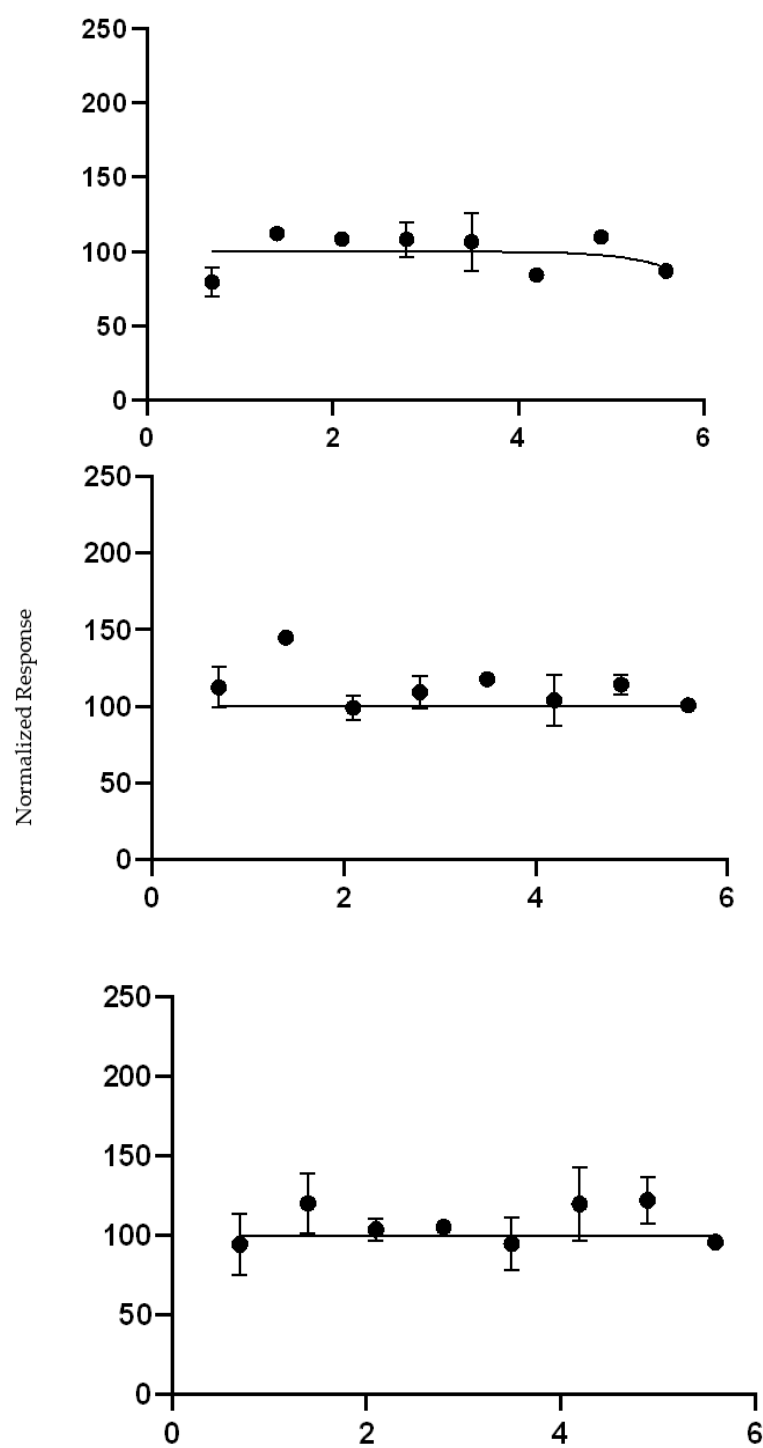

**Figure S6.** Log dilutions of pre-COVID-19 serum samples versus RLU expressed as normalized response.



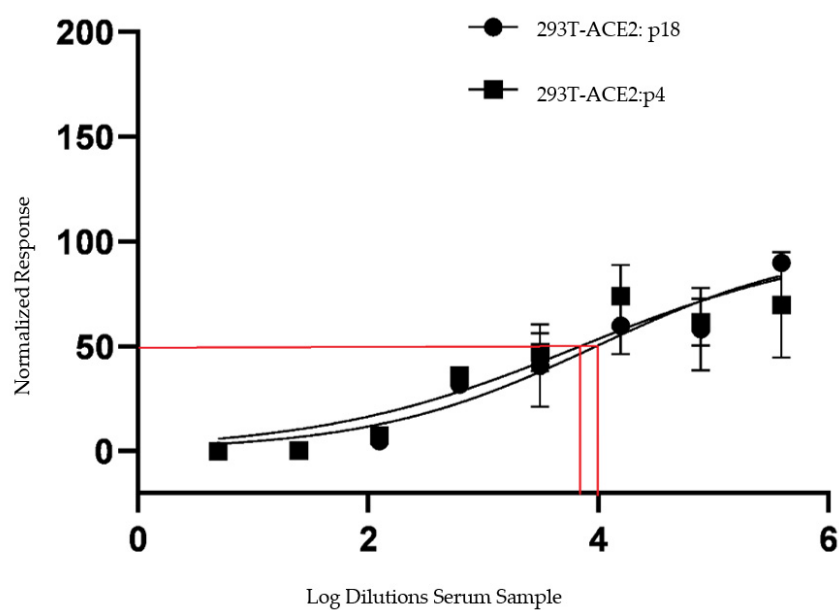

**Figure S7.** Log dilutions of serum samples versus RLU expressed as normalized response using 293T-ACE2 cells passage #4 versus passage #18.

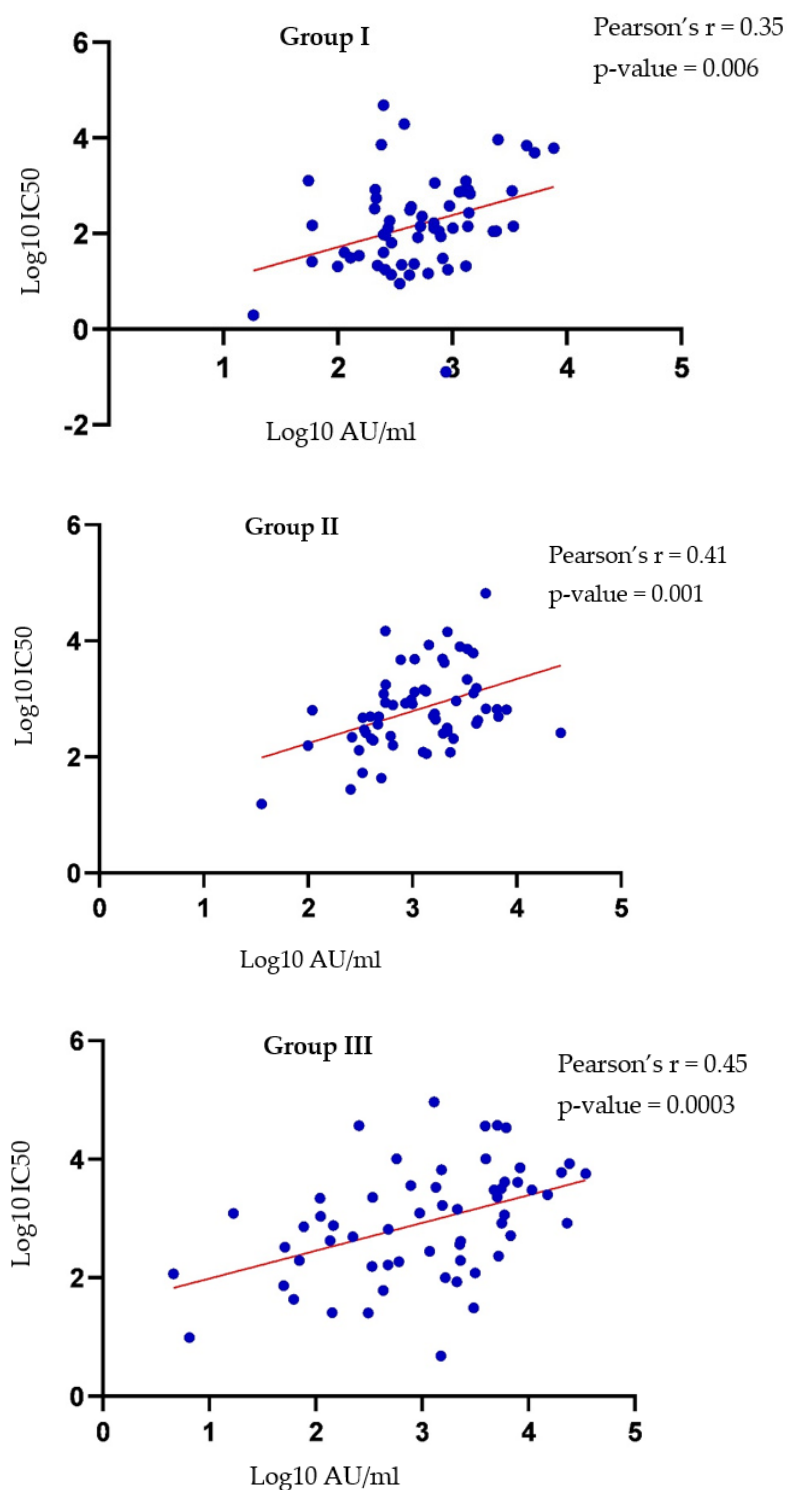

**Figure S8.** Correlation of log10 IC50 and log10 AU/ml values obtained following pseudotyped lentivirus antibody neutralization assay, and SARS-CoV-2 IgG II Quant immunoassay, segregated by the three groups of study participants.

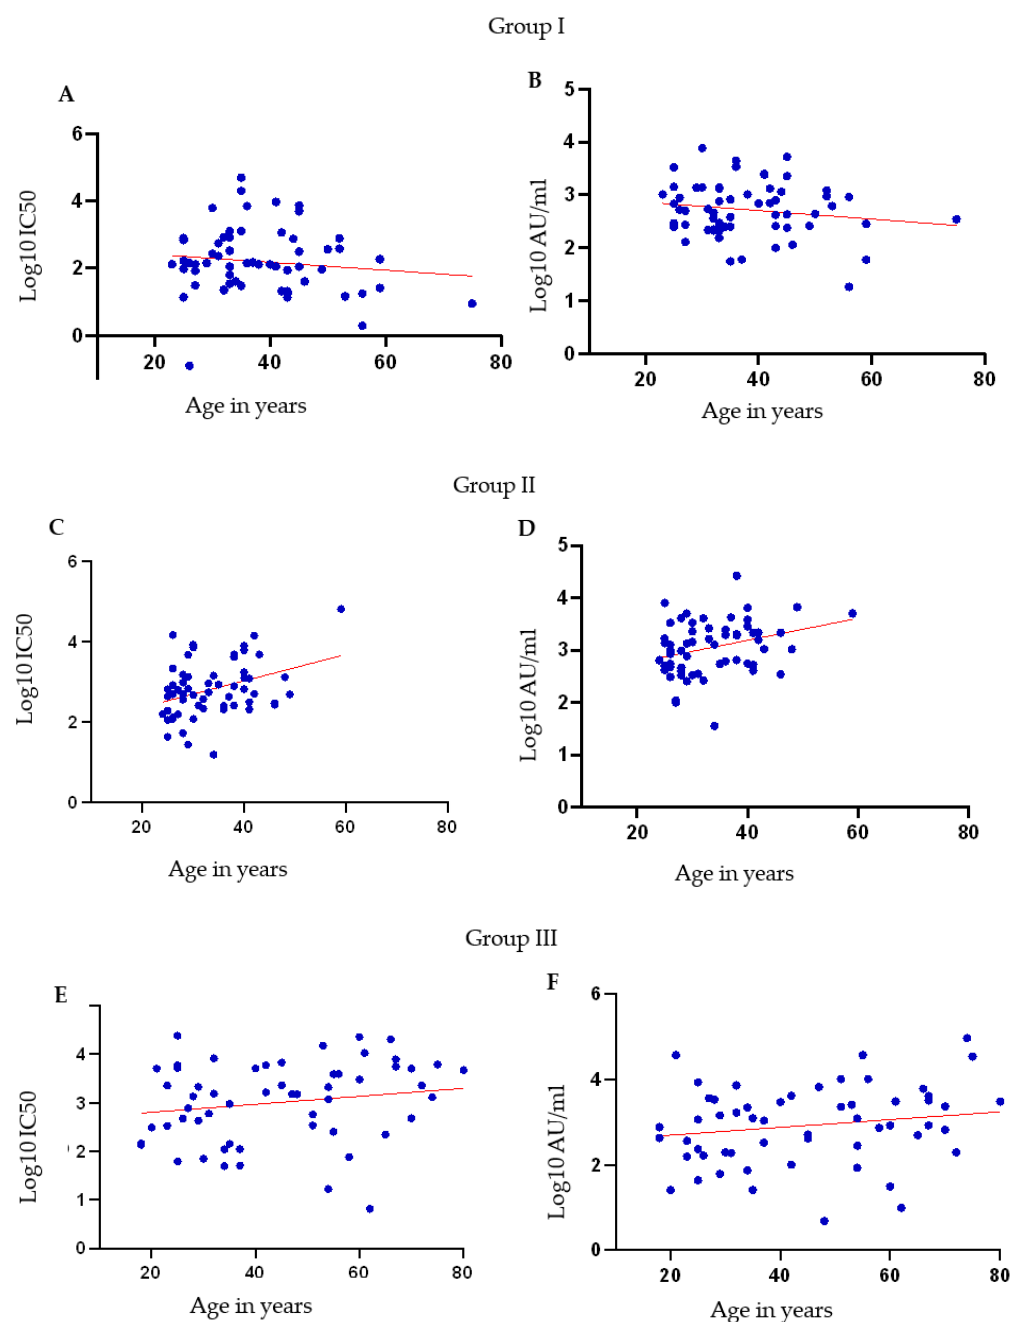

**Figure S9.** Correlation of antibody titers with ages in years of study participants. A, C & E indicate the correlation of log<sub>10</sub> IC<sub>50</sub> values obtained following pseudotyped lentivirus antibody neutralization assay with age, while B, C, & D show the correlation between log<sub>10</sub> AU/ml values using the SARS-CoV-2 IgG II Quant immunoassay (B, D, F) and ages of participants respectively.
